# Supplementary material for: A cationic and ferromagnetic hexametallic Mn(iii) single-molecule magnet based on the salicylamidoxime ligand
Source: Royal Society of Chemistry journal article supplement (doi:10.1039/c3dt51512e), 2013-01-01
Supplement: c3dt51512e.pdf [file c3dt51512e.pdf]

## Electronic Supplementary Information (ESI)

### A cationic and ferromagnetic hexametallc Mn(III) Single-Molecule Magnet based on the salicylamidoxime ligand

José Martínez-Lillo,\* Neil Dolan and Euan K. Brechin\*

*EaStCHEM School of Chemistry, The University of Edinburgh, West Mains Road, EH9 3JJ, Edinburgh, Scotland, UK. E-mails: [fmartine@staffmail.ed.ac.uk](mailto:fmartine@staffmail.ed.ac.uk) and [ebrechin@staffmail.ed.ac.uk](mailto:ebrechin@staffmail.ed.ac.uk). Tel: +44 (0)131 650 7545. Fax: +44 (0)131 650 6453.*

**Preparation of 1.** All manipulations were performed under aerobic conditions, using materials and solvents as received.  $\text{Mn}(\text{ClO}_4)_2 \cdot 6\text{H}_2\text{O}$  (0.249 g, 6.88 mmol) was dissolved with continuous stirring in EtOH (20 mL), then  $\text{H}_2\text{N-saoH}_2$  (0.102g, 6.70 mmol) was added followed by pyridine (1mL, 12.4 mmol) and  $\text{NEt}_3$  (0.05 mL, 3.58 mmol). The dark green final solution was left to evaporate in a fumehood at room temperature. Dark green crystals were formed in 1 day, which were suitable for X-ray diffraction studies. Yield: 72%. Anal. Calcd. (found) for  $\text{C}_{76}\text{H}_{78}\text{O}_{24}\text{N}_{18}\text{Cl}_2\text{Mn}_6$  (**1**): C, 45.0 (45.5); H, 3.9 (4.1); N, 12.4 (12.3) %. IR peaks (ATR/ $\text{cm}^{-1}$ ): 1597, 1086, 1036, 1017, 878, 700, 673, 638, 628.

A)

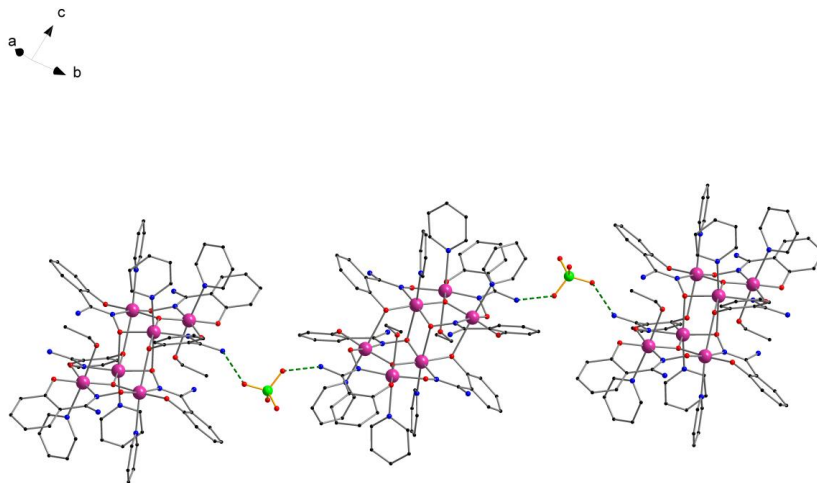

**B)**

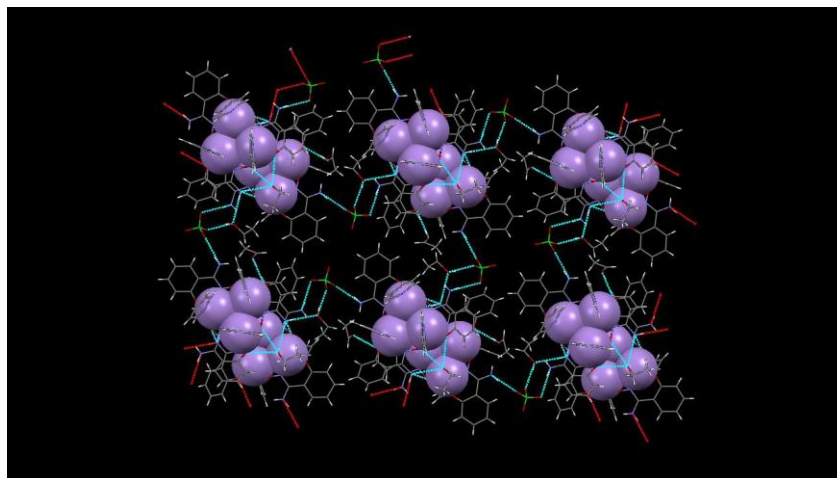

**C)**

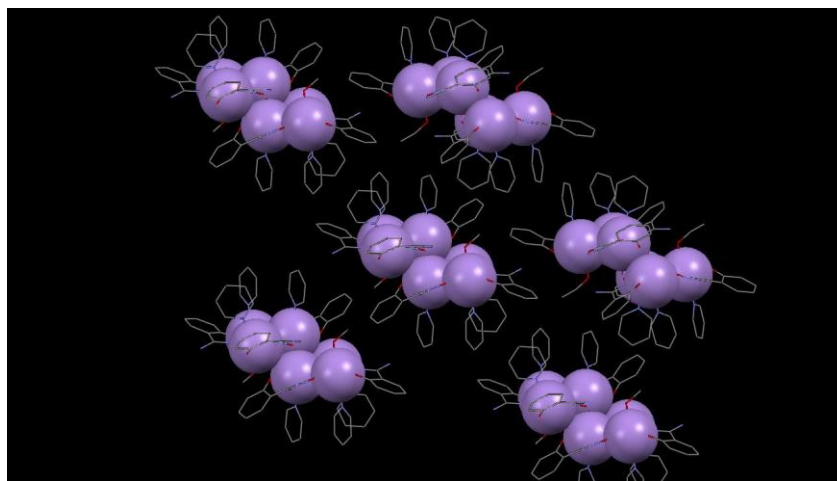

**Figure S1.** (A) Perspective view of the unidimensional arrangement of  $[\text{Mn}_6(\mu_3\text{-O})_2(\text{H}_2\text{N-sao})_6(\text{py})_6(\text{EtOH})_2]^{2+}$  cations and  $\text{ClO}_4^-$  anions in **1** through H-bonding interactions (dashed lines). Solvent molecules have been omitted for clarity. [Colour code: pink, Mn; red, O; blue, N; black, C; green, Cl]. (B) Expansion of this interaction into 2 dimensions, highlighting the H-bonded square sheets. (C) View of the interdigitated  $\text{Mn}_6$  cluster cations in the third dimension.

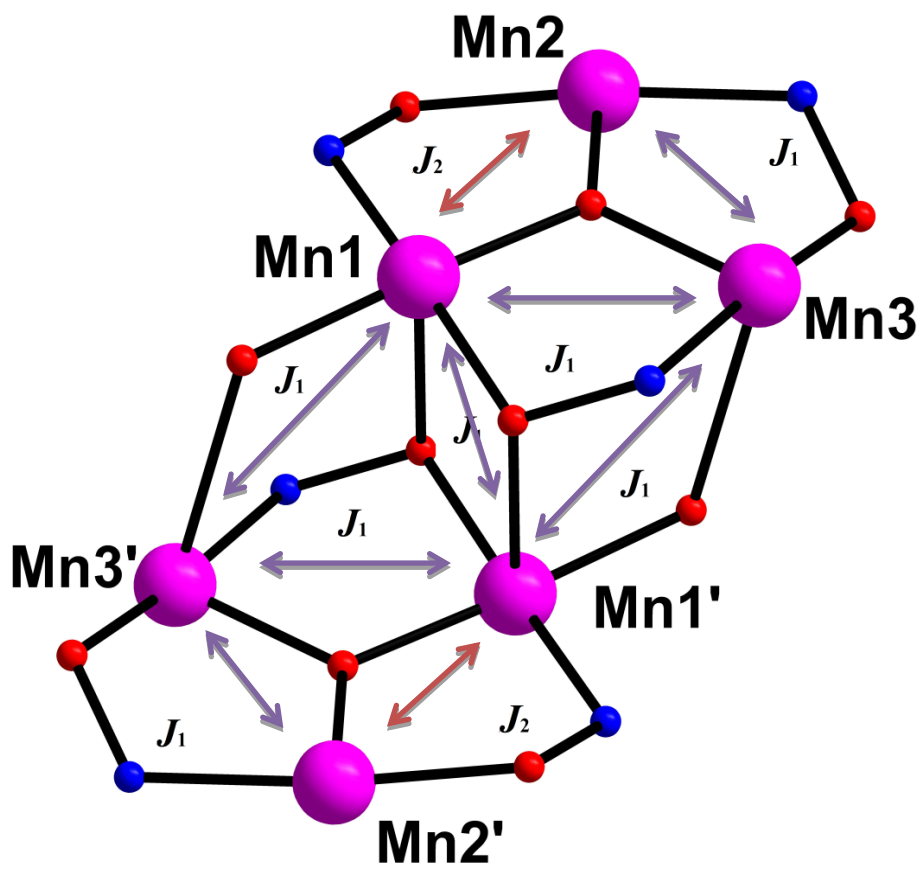

Figure S2. Two  $J$  coupling exchange model used for the fit of compound 1.

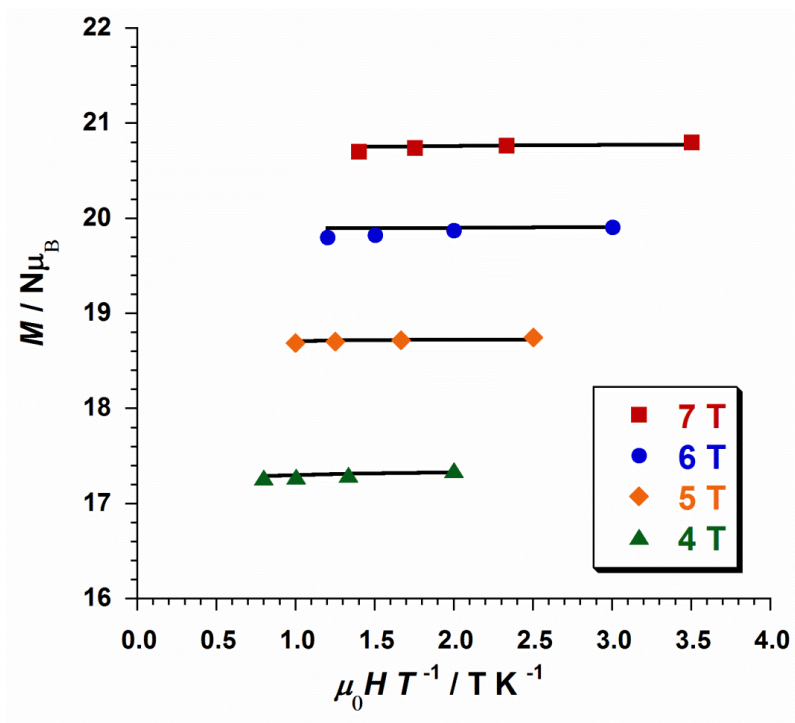

**Figure S3.** Plot of the reduced magnetisation ( $M/N\mu_B$  vs.  $H/T$ ) for **1** in 4, 5, 6 and 7 T fields and temperatures 2–7 K. The solid lines represent the best fit of the experimental data with  $S = 12$ ,  $g = 1.98 \pm 0.02$  and  $D_{\text{cluster}} = -0.34 \pm 0.02 \text{ cm}^{-1}$ .
